# Supplementary material
Source: bioRxiv or medRxiv preprint supplement (https://www.biorxiv.org/highwire/filestream/62291/field_highwire_adjunct_files/0/204875-1.pdf)

# Additional File 1

**a**

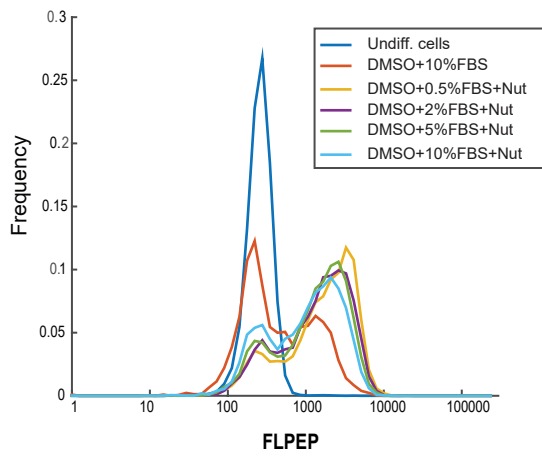

**b**

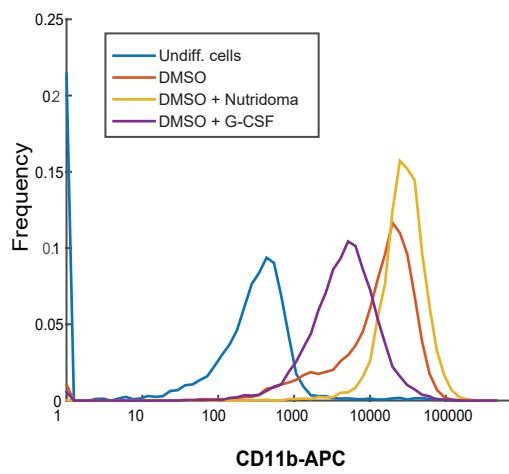

**c**

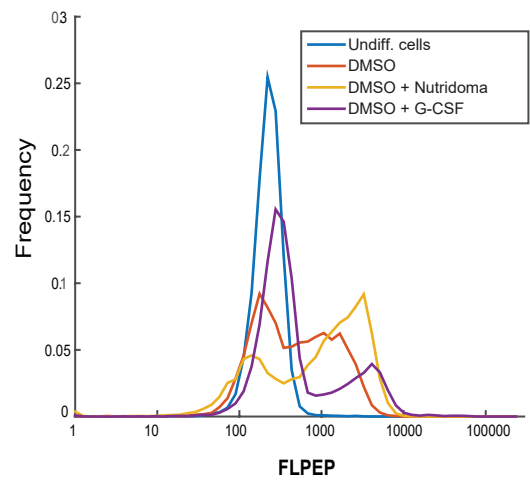

Supplement: Supplementary file [file 204875-1.pdf]
